# Supplementary material for: Differential Associations between Trauma Types and Borderline Personality Disorder from the Perspective of Emotion Dysregulation
Source: Research Square preprint supplement (doi:10.21203/rs.3.rs-2235871/v1), 2022-11-28
Supplement: Supplementary file 1 [file cae97323a16bd4ab18e5ae47.docx]

**Title Page: Differential Associations between Trauma Types and Borderline Personality Disorder from the Perspective of Emotion Dysregulation**

First Author/Corresponding Author:

Yan Yuan, LCSW, PhD

Postdoctoral Associate

School of Social Work,

University of Pittsburgh,

2203 Cathedral of Learning, 4200 Fifth Ave

Pittsburgh, PA 15260

Phone: 412-501-3815

Fax: 412-624-6323

Email: yay57@pitt.edu

Second Author:

Hyunji Lee, MSW, PhD

College of Social Work, Florida State University

Email: hlee18@fsu.edu

Third Author

Christina E. Newhill, PhD, LCSW

Professor and Doctoral Program Director

School of Social Work, University of Pittsburgh

Email: newhill@pitt.edu

Fourth Author

Shaun M. Eack, LCSW, PhD

James and Noel Browne Endowed Chair, Associate Dean for Research,

Professor of Social Work and Professor of Psychiatry

University of Pittsburgh

Email: sme12@pitt.edu

Fifth Author

Rachel Fusco, PhD

Associate Professor

School of Social Work, University of Georgia

Email: Rachel.Fusco@uga.edu

Sixth (Senior) Author

Lori Scott, PhD

Assistant Professor

Department of Psychiatry, University of Pittsburgh

Email: scottln2@upmc.edu

**Differential Associations between Trauma Types and Borderline Personality Disorder from the Perspective of Emotion Dysregulation**

**Abstract**

**Background:** Borderline Personality Disorder (BPD) is characterized by pervasive instability in a range of areas including interpersonal relationships, self-image, and affect. Extant studies have consistently identified significant correlations between childhood trauma and BPD. While exploring this trauma-BPD link,a number of cross-sectional studies commonly emphasize the role of emotion dysregulation (ED). A better understanding of the association between trauma and BPD is essential in formulating early, effective intervention approaches, and in addressing varied adverse impacts.

**Methods:** We analyzed a subset of data collected for a larger community-based longitudinal study. Given that our current focus on trauma and ED, only those participants who completed the baseline assessment measures of trauma and ED (N=144) were included for the primary analyses. We conducted stepwise multivariate linear models to examine the differential relationships between BPD features, ED, and specific traumas. A path analysis with latent factors using the structural equation modeling (SEM) method was performed to test the indirect effect from trauma to BPD features via ED.

**Results:** Linear regression models revealed that emotional abuse (relative to other trauma types) was significantly associated with high BPD features. The SEM, by constructing direct and indirect effects simultaneously, showed that (1) ED partially mediated the path from trauma to BPD features; and (2) trauma played a complex role in which the direct effect remained significant even after accounting for the indirect effect through ED.

**Conclusions:** Our results highlight a most consistent association between emotional abuse and trauma, indicating its unique role in understanding BPD features in the context of childhood adversity. Further, shame-related negative appraisal and ED were found critical when examining the association between trauma and BPD, possibly providing promising treatment targets for future practices.

Key Words: Trauma, Abuse, Maltreatment, Emotion Dysregulation, Borderline Personality Disorder

**Differential Associations between Trauma Types and Borderline Personality Disorder from the Perspective of Emotion Dysregulation**

**Background**

Borderline Personality Disorder (BPD) is characterized by pervasive instability in a range of areas including interpersonal relationships, self-image, and affect. People with BPD often evidence marked impulsivity manifested in various contexts such as overspending, risky sex, substance use, and/or binge eating [1]. The median population prevalence of BPD ranges from 1.6% to as high as 5.9%[1]; nevertheless, Lenzenweger (2010) concluded the general population prevalence to be approximately 1% based on an overview of international and national studies [3–5]. BPD is associated with many adverse psychosocial impacts, including impairment in interpersonal relationships and employment, excessive utilization of medical services, and marital distress and violence [6–9].

**Literature Review**

Extant studies have consistently identified significant correlations between childhood trauma and BPD [10–16]. Commonly reported traumas by adults with BPD in cross-sectional studies include emotional abuse, verbal abuse, physical abuse, sexual abuse, and neglect, with sexual abuse being most frequently associated with a diagnosis of BPD among adults [17]. Additional trauma-related risk factors for BPD include caregivers’ failure to protect, denial of feelings, emotional withdrawal, and non-interpersonal trauma.

While exploring this trauma-BPD link,a number of cross-sectional studies focusing on adult populationscommonly emphasize the role of emotion dysregulation (ED), specifically a high sensitivity to negative emotional stimuli[18–20]. For example, Tyrka et al. (2009) suggested that a sensitivity to negative emotional stimuli is a central aspect of BPD symptomatology, and they found in a community sample of adults with childhood experiences of abuse and neglect were more likely to report symptoms of BPD than those without such childhood adversities[16]. Gratz et al. (2008), employing a sample of inner-city substance users, found a partial indirect effect via emotion dysregulation between childhood trauma and BPD status. Their work further identified emotional abuse as the only factor significantly associated with BPD status after controlling for other forms of abuse and negative affect [15].

Emotion regulation (ER) involves the ability to modify one's emotional processes across several areas such as goals, awareness, or strategies [21,22]. Emotion dysregulation (i.e., unsuccessful ER) usually concerns failure in targeting one or several of these cognitive/behavioral areas. For instance, an individual might lack awareness of their own emotions, be unable to activate or achieve a goal, and/or lack adaptive strategies to alter emotional processes [21]. In line with Linehan’s biosocial theoretical perspective of BPD, ED can manifest as excessive sensitivity to negative emotional stimuli, a high amplitude of emotional response and/or a slow return to baseline [18,23]. For example, a study of undergraduate women showed that emotional vulnerability (including a heightened sensitivity to emotional stimuli and a slow return to baseline) was significantly associated with symptoms of BPD [24]. In addition, another study of a community sample indicated that negative affectivity was significantly associated with BPD symptoms, and a maladaptive emotion regulation strategy (thought suppression) fully mediated the relationship between negative affect and BPD symptoms [25]. Consistent with previous studies, emotion dysregulation was also found to have indirect effects on features of BPD while taking negative emotional intensity and reactivity into account [26].

An elevated sensitivity to negative emotional stimuli has been consistently reported among BPD individuals [15,27,28]. Among those which examined trauma as key risk factors , three types of NA were frequently reported by individuals with BPD, including shame, guilt, and anger [20,29–32]. For instance, shame is consistently associated with an early experience of sexual abuse and results in a wide array of negative outcomes relevant for BPD symptomatology, including low self-esteem, negative self-appraisals, intolerance of disapproval and problematic interpersonal relationships [29]. Likewise, persistent anger has been noted among trauma survivors, especially for those who later carry a diagnosis of PTSD. Finally, maladaptive regulation of negative emotions was reported to be associated with several psychopathologies, including BPD [33].

**Aims and Significance of the Current Study**

A better understanding of the association between trauma and BPD is essential in formulating early, effective intervention approaches, and in addressing varied adverse impacts on interpersonal relationships and employment, excessive utilization of medical services, and marital distress and violence. Knowledge of key factors such as ED and NA will potentially contribute to early identification of BPD traits; however, whether these factors play a role in associations between trauma and BPD symptom categories needs to be further examined. Improved knowledge in this aspect will in particular facilitate effective prevention and inform future practice.

In light of this, the aims of the current study are: (1) to examine the differential association of trauma types with BPD features, and (2) to examine the direct and indirect relationships between trauma and BPD, potentially through the third channel of ED. In addition to a general relationship between trauma and BPD as suggested by previous literature, we hypothesize that (1) differential associations exist between trauma types and BPD features: Specifically, in line with a large number of cross-sectional studies, sexual abuse may have a stronger association with BPD relative to other trauma types, and (2) further there will be a significant indirect effect of trauma through the channel of ED examined by structural equation modeling.

**Methods**

**Participants and Procedures**

This study is a secondary analysis of a subset of data collected for a larger community-based longitudinal study (Pittsburgh Girls Study [PGS]). The PGS involves 2,450 girls (now women) who were initially recruited in 1999 and 2000 when they were ages 5 to 8 years old (see Keenan et al., 2010 for further details on PGS recruitment and study design). Participants for the sub-study, which focused on aggressive and self-harming behavior in young women, were identified from the larger PGS based on self-reports of recent aggressive behavior, suicidality, or self-injury (see [34] for additional details). A total of 166 young women were recruited and consented to participate in the sub-study. During initial assessments (baseline) of the sub-study, participants completed a battery of clinical interviews and self-report measures (see Measures section for details). Follow-up assessments (data not presented here) occurred at 6- and 12-months, respectively, after the initial assessments.

Given that our current focus is on trauma and ED, only those participants who completed the baseline assessment measures of trauma and ED (N=144) were included for the primary analyses and the results presented here. These participants were between the ages of 18 and 24 (*M* = 21.51, *SD* = 1.57), and were primarily African American or non-Hispanic White. The demographics of this sub-study sample were similar to those of the larger longitudinal study (redacted citation) from which participants were selected (see Table 1 for additional information).

**Measures**

***BPD in the Linear Regression Models.***

The Structured Interview for DSM-IV-TR Personality (SIDP-IV;[35]) was used to generate dimensional BPD scores for our linear models. The SIDP-IV is a semi-structured diagnostic interview for DSM-IV-TR personality disorders. Interviews were administered by research staff with a bachelor’s degree or higher who were trained to reliability by a doctoral-level clinical psychologist. SIDP-IV items are rated on a 0 to 3 scale (0 = *not present*, 1 = *subthreshold*, 2 = *present*, 3 = *strongly present*). Dimensional scores (a sum of all BPD item scores) were used as an index of BPD symptomatology severity. The BPD items demonstrated adequate internal consistency for dimensional BPD scores in this subsample (Cronbach’s *α*=.87).

***BPD in the SEM model.***

The Personality Assessment Inventory-Borderline Features Scale (PAI-BOR, [36] )is a 24-item self-report measure that assesses four dimensions underlying BPD: affective instability, identity problems, negative emotions, and self-harm. The PAI-BOR is used to measure subconstructs of BPD in our structure equation model (SEM) as it categorizes symptoms into four BPD domains which can be used to specify the measurement model in SEM in addition to assess the relationships among three latent factors (ED, trauma and BPD). Intraclass coefficients among this sample for subscales are as follows: Affect instability (*α*=.72), identity problems (*α=.*68), self-harm (*α=.*73), and negative relationships (*α=*.64).

***Trauma.***

The Childhood Trauma Questionnaire Short Version (CTQ-SF; [37]) items ask about experiences from early childhood to adolescence, which are rated on a 5-point scale with response options ranging from Never True to Very Often True. The CTQ-SF produces a total score and five trauma-related subconstructs—physical, sexual, and emotional abuse, and physical and emotional neglect. The CTQ-SF showed good reliability among this sample. Intraclass correlation coefficients for subscales are: Physical neglect (*α=*.71), emotional abuse (*α=*.82), emotional neglect (*α=*.84), physical abuse (*α=*.76), and sexual abuse (*α=*.93).

***Emotion Dysregulation.***

The Difficulties in Emotion Regulation Scale (DERS; [38] ) is a 36-item self-report measure that was developed to assess emotion dysregulation comprehensively, including items that reflect difficulties in six emotional dimensions: Non-acceptance, Goals, Impulse, Strategies and Clarity [38]. More specifically, Non-acceptance means non-accepting reactions to negative emotions or stress; the Goals dimension contains items reflecting difficulties in engaging in goal-directed behaviors (such as concentrating or accomplishing tasks); the Impulse dimension consists of items that describe difficulties with controlling behaviors under negative emotions; the Awareness (reverse-coded) scale assesses the ability to attend to and recognize emotions; the Strategies dimension includes items that evaluate limited access to regulation strategies; and Clarity measures lack of clarity about one’s own emotions(e.g. unable to identify one’s emotions). Each item of the DERS is rated on a 5-point scale ranging from 1 “almost never” to 5 “almost always”. DERS demonstrated good internal consistency among our sample as indicated by intraclass correlation coefficients for subscales of non-acceptance (*α=*.85), goals (*α=*.72), impulse (*α=*.81), strategies (*α=*.85) and clarity (*α=*.85).

***Shame/Guilt.***

The Guilt and Shame Proneness scale (GASP) is a 16-item self-report scale that assesses individuals’ tendencies to experience shame and guilt following embarrassing or offensive events across different settings [39]. The GASP consists of two shame subscales (negative behavior-evaluations and repair action tendencies) and two guilt subscales (negative self-evaluations and withdrawal action tendencies). For the two guilt subscales, negative behavior-evaluations items address bad feelings about one’s actions, whereas repair items describe behavioral intentions such as correcting one’s mistakes (e.g., “you would try to act more considerately toward your friends”). As far as the shame subscales, negative self-evaluations consist of items about feeling bad about oneself, whereas withdrawal items address tendencies to hide from the public (e.g., “you would avoid the guests until they leave”). Each item of the GASP is rated on a 7-point scale, with “1” indicating “very unlikely” and “7” indicating “very likely”. Finally, internal consistency for GASP was unsatisfactory among our sample. The intraclass correlation coefficients are: Negative behavior-evaluations (*α* =.69), repair action tendencies (*α* =.54), negative self-evaluations (*α* =.72) and withdrawal action tendencies (*α* =.55).

***Anger.***

The original State-Trait Anger Expression Inventory-2 (STAXI-2) is a 57-item self-report measure comprised of six subscales: State Anger, Trait Anger, Anger Expression‐In, Anger Expression‐Out, Anger Control‐In, and Anger Control‐Out [40]. We utilized an abbreviated anger scale that included only Trait Anger, Anger Expression-In, Anger Expression-Out, and Anger Control (we used mean scores of both Control-in and out scores, which were also reverse coded). In terms of each subscale, Trait Anger measures the disposition to experience anger with or without provocation; Anger Expression-In assesses the frequency of controlling one’s angry feelings; Anger Expression-Out measures how often one takes actions upon his/her anger; and Anger Control measures one’s ability to control one’s anger by utilizing positive outlets (Control-out) or calming oneself down (Control-in). The internal consistency of each subscale in this sample was adequate. The intraclass correlation coefficients are: Trait Anger (*α* =.88), Anger Expression-In (*α* =.71), Anger Expression-Out (*α* =.83), and Anger Control (*α* =.81).

**Analyses**

***Linear Regression Models.***

To examine the differential relationships between BPD features, ED, and specific traumas, we conducted stepwise multivariate linear models. The initial model was comprised of five single trauma types as main predictors. Step two included DERS constructs as additional independent variables. Step three added four anger variables: Trait Anger, Anger Expression-out, Anger Expression-in and Anger Control (this variable was reversed coded). The final step further included four subconstructs of shame/guilt. Finally, performance of different models (e.g. model *R2*) were evaluated and compared.

***SEM.***

In order to test the indirect effect from trauma to higher BPD features through ED, we conducted path analysis with latent factors using the structural equation modeling (SEM) method in R. The structural model was comprised of the latent predictor Trauma, the latent outcome variable BPD, and the mediator ED. The measurement model is specified as follows: Trauma is measured by five trauma subtypes (physical abuse, sexual abuse, emotional abuse, physical neglect and emotional neglect), BPD by four symptomatic categories (affective instability, identity problems, negative emotions and self-harm), and ED by six emotional subconstructs (non-acceptance, goals, impulse, awareness, strategies, and clarity) (Figure 1).

**Results**

**Preliminary Analyses**

To select potential control variables, characteristic differences based on demographic factors (such as race, sexual orientation, marriage status, employment and education) in BPD dimensional scores were assessed using Multi-factor Analysis of Variance (ANOVA). Results from Multi-factor ANOVA evidenced no significant between-group differences in BPD scores.

**Regression Models**

Table 3 presents parameters and model fit indices of all our multiple regression models. Results from model 1 indicated that only emotional abuse (*b*=.19, *t*=2.01, *p*=.05) was significantly associated with higher BPD features. The overall model *R*2 was significant, accounting for approximately 18% of the variance. Adding DERS subconstructs, model 2 showed that the effect of EA became marginally significant and impulsivity (*b*=.28, *t*=3.60, *p*<.001) was significantly correlated with higher BPD scores. There is a significant increase in model *R2*, indicating an improvement in model performance. In Model 3, we introduced four additional predictors: Trait Anger, Anger Expression-out, Anger Expression-in and Anger Control (this variable was reversed coded). There was no improvement in the model performance and impulsivity remained significant (*b*=.23, *t*=2.38, *p*<.05) whereas other predictors were not. In the final model, four subconstructs of shame/guilt were added, and results demonstrated that EA (*b*=.17, *t*=1.98, *p*<.001) and Shame (negative self-evaluation; *b*=-0.79, *t*=-2.49, *p*<.05) were significantly associated with BPD scores. The final model was significantly improved from model 3 and 4, accounting for about 41% of the variance.

**SEM**

The initial SEM model had unsatisfactory performance (*CFI* =.67, *SRMR*=.12, and *RMSEA* =.13 (90%*CI*: .11~ .14)). Model performance and subsequent modifications can be evaluated using two main types of statistics: (1) Wald statistics (estimated increase in X2 given a prior estimated path parameter fixed to a known value) and (2) LaGrange Multiplier method (predicted decrease in X2 given a prior fixed path parameter were to be estimated) [41]. The stepwise multivariate Wald test in Lavaan [42] indicated that four non-significant paths can be eliminated from the initial model (the predictions of ED by emotional awareness, both guilt subconstructs, and one shame subscale of negative self-evaluation). The LaGrange Multiplier method was subsequently applied for further diagnosis and modification. From the results, five covariances (See Figure 1 and Table 4) were added iteratively to improve the model performance. In this procedure, only covariances underlying the same factor were selected iteratively (e.g., ED manifest variables were allowed to covary); whereas cross-loadings (variables measuring across factors: e.g., ED subconstruct with Trauma subconstruct) were not allowed given that it will be theoretically misleading.

The modified model was significantly improved from the initial model despite no significant difference from the observed model (*ΔX2*=367.57). However, the following indices showed an overall good fit of the final model [*CFI* =.93, *SRMR*=.067, and *RMSEA* =.06 (90%*CI*: .04~ .07)]. As can be seen in Table 5, the final model revealed that three factors were generally well identified with good construct validity. From information presented in Figure 1 and Table 5, there were significant direct effects of trauma on ED (*b*=.36, *z* =5.05, *p* <.001) and ED on BPD (*b*=.74, *z* =5.88, *p* <.001). After accounting for the indirect effect of trauma on BPD via ED (*Δb*=.21, *z* =2.86, *p* <.01), the total effect of trauma on BPD remained significant (*b*=.57, *z* =5.70, *p* <.001). In other words, higher childhood trauma significantly predicted heightened BPD symptomatology, partially mediated through ED. In addition, trauma showed a significant and unique effect after controlling for the indirect effect via ED.

**Discussion**

**Summary of Key Findings**

By testing direct associations between BPD features, ED constructs and trauma types, we have identified that only emotional abuse (relative to other trauma types) was significantly associated with high BPD features; further, some ED constructs (such as impulsivity and proneness to shame) may bear special meanings to BPD features. Our SEM model, by constructing direct and indirect effects simultaneously, further revealed that (1) ED partially mediated the path from trauma to BPD features; and (2) trauma played a complex role in which the direct effect remained significant even after accounting for the indirect effect through ED.

**Trauma Types and Emotional Abuse**

Although multiple regression results evidenced a significant effect of emotional abuse (EA) on BPD symptomatology, other types of abuse were not significantly associated with BPD features. Emotional abuse significantly predicted BPD features, replicating previous findings on the relationship between childhood emotional abuse and BPD symptoms [43–47]. Commonly posited etiological explanations for this finding have included the presence of emotion dysregulation, attachment disturbance and a dynamic biosocial interaction [43,44,48,49].

Indeed, this finding on emotional abuse could be interpreted to be consistent with Linehan’s biosocial theory, in which BPD etiology is conceptualized as a dynamic interplay between inherited emotion regulation vulnerabilities and invalidating environments [18]. Examples of emotional abuse items in the Childhood Trauma Questionnaire are: “People in my family called me things like stupid, lazy, or ugly” and “I thought my parents wished I had never been born”[37]. Those verbal assaults are typical of invalidating environments, where belittling of feelings, and suppression of negative emotions frequently happen. Therefore, emotional abuse may be a key feature of invalidating environments that elevates risk for BPD symptoms.

Inconsistent with a large body of BPD literature, our findings did not support a significant effect of sexual abuse on BPD symptomatology[45,50–52]. Notably, our participants endorsed the lowest mean score of sexual abuse (*Mean*=7.56, *SD*=5.14) relative to other trauma types. The comparatively low mean score may be partially explained by the fact that emotional abuse and physical neglect are more prevalent than sexual abuse in the general population [50,53,54]. Hence, given the lower rates of sexual abuse in our sample than those in clinical samples, it might be possible that we may not have found a relationship due to limited range on this variable.

**Shame and Emotion Dysregulation**

A subtype of shame was shown to have a significant association with BPD features. Specifically, this subtype is a negative self-evaluation which denotes an unfavorable appraisal of self as a result of feeling shame. This interesting finding is in line with attachment theoretical explanations. Griffin and Bartholomew [55] conceptualize adult attachment styles in terms of mental representations of self and others as follows: positive self and other representations (secure pattern), positive self and negative other representations (dismissing pattern), negative self and positive other representations (preoccupied pattern), and negative self and other representations (fearful pattern). From this perspective, shame-negative-self is analogous to negative-self dimension. The function of this particular emotion might resemble that of a preoccupied anxious attachment, which has been consistently marked among people with early trauma exposure and those with BPD [48,56,57]. Further, shame is an example of social emotions, which primarily arise within interpersonal contexts [58]. Socially maladaptive regulation of shame can undermine one’s abilities to manage interpersonal relationships and vice versa. Such interrelatedness between interpersonal context and social emotions, hence, is highly compatible with BPD symptomatology.

Finally,our SEM results supported a partial indirect effect of trauma on BPD features via elevated ED. This corroborates multiple lines of BPD literature [15,59–61]. Further, there were studies that investigated how unique aspects of emotion dysregulation might be differentially associated with distinct trauma types in accounting for higher BPD features. Researchers found that emotional neglect was related to less adaptive emotion regulation abilities (e.g., less frequent use of cognitive reappraisal), whereas emotional abuse was associated with higher dysfunctional or maladaptive emotion regulation strategies (more frequent use of expressive suppression). Although precise definitions of emotional neglect vary by state laws, emotional neglect is commonly defined as the failure of a parent or caretaker to provide affection or emotional support to the child [62]. Emotional neglect also includes any act that places the child at risk of being exposed to parental substance abuse or domestic violence [62]. These unique influences from particular aspects of ED did not emerge for other trauma types [43,63]. It is noteworthy that the effect of trauma remained significant even after accounting for ED, indicating a unique role of trauma in exacerbating BPD symptoms that is worthy of further investigation.

**Conclusions**

Our results highlight a most consistent association between emotional abuse and trauma, indicating its unique role in understanding BPD features in the context of childhood adversity. Further, shame-related negative appraisal and ED were found critical when examining the association between trauma and BPD, possibly providing promising treatment targets for future practices.

First, early screening of trauma-related symptoms and employment of trauma-informed care should be integrated into traditional BPD treatments and in settings where individuals with BPD who are in crisis may be seen, e.g. psychiatric emergency departments and outpatient/inpatient care units. Second, emotional regulation difficulties should be targeted when treating people with trauma experiences. Third, it can be especially useful to address key trauma-related negative emotions in treatment, such as shame and related maladaptive regulating strategies.

Regarding trauma care relevant to BPD populations, as inspired by our study, a trauma-informed emotion regulation skills training can potentially include topics such as (1) mindfulness strategies for coping with trauma-related emotions, (2) validation of negative emotions, and (3) learning reappraisal of negative experiences. Furthermore, for individuals with BPD without a diagnosis of trauma or stress-related disorders, facilitating a supportive, genuine and empathic dialogue at minimum would promote early and accurate screening for trauma symptomatology. As noted earlier, emotional abuse and emotion-related invalidation are highly prevalent among BPD populations (with or without a co-occurring trauma diagnosis); therefore, emotion regulation skills training targeting emotional invalidation can potentially lead to effective results.

For those with active co-occurring diagnoses, trauma informed treatment work which integrates traditional BPD psychotherapies with trauma-processing narratives, trauma-informed psychoeducation sessions, and exposure-based techniques can be helpful [64–68]. Last but not least, maintaining control of therapy-interfering or other high-risk behaviors, e.g. self-harm, can be critical before implementing any type of trauma care or related treatments. Crises such as high levels of life-threatening (e.g., suicide attempts) and/or therapy-interfering behaviors (e.g., dishonesty with therapist, frequent threatening to quit or non-completion of any homework assigned) before processing traumatic memories and emotions, given that the presence of aforementioned crises might prevent the individuals from effectively discussing and managing emotion about the trauma, or they may not have the skills yet to regulate the emotions. To this aim, it will be necessary to conduct an early evaluation of the risks, establish a trusting therapeutic relationship as well as develop action plans to ensure safety [69].

**Limitations**

One limitation of our study concerns the predominant use of self-report measures (with the exception of our interview measure of BPD features), which can lead to recall biases. In terms of participants, our sample included only females (though the sample is diverse with regard to race and socioeconomic status); hence, generalizability to other genders is limited. Further, our age range is restricted to emerging adulthood, hence generalizability to other developmental stages can be limited. More rigorous designs will be required to obtain more reliable knowledge. Future research should address comparing the differential effects between momentary emotional reactions and stable traits in exacerbating BPD symptoms after traumatic exposure in order to gain more knowledge about the specifics of ED. Moreover, different age groups can be recruited (such as adolescents and adults in the late twenties) and members of different racial/ethnic groups to further advance the current knowledge on different developmental ages and the role of culture. In addition, research studies can utilize repeated measures and causal inference techniques to improve the research design.

Despite the limitations, we comprehensively investigated emotion dysregulation, several distinct forms of negative affect and unique trauma types in affecting BPD symptoms during emerging young adulthood. We revealed that emotional abuse in relative to other trauma types can be specifically related to BPD features, and trainings on regulating trauma-related social emotions, such as shame, can be a potential target for future practice.

**List of Abbreviations**

ED: Emotion dysregulation

ER: Emotion regulation

EA: Emotional abuse

BPD: Borderline Personality Disorder

PGS: Pittsburgh Girls Study

SIDP-IV: Structured Interview for DSM-IV-TR Personality

PAI-BOR: Personality Assessment Inventory-Borderline Features Scale

CTQ-SF: Childhood Trauma Questionnaire Short Version

DERS: Difficulties in Emotion Regulation Scale

GASP: The Guilt and Shame Proneness scale

STAXI-2: State-Trait Anger Expression Inventory-2

SEM: Structural equation modeling

**Declarations**

**Ethics approval and consent to participate:** This study was reviewed and approved by University of Pittsburgh Institutional Review Board (the letter of approval enclosed).

**Consent for publication:** Not applicable.

**Availability of data and materials:** The data that support the findings of this study are available from Pittsburgh Girls’ Study, but restrictions apply to the availability of these data, which were used under license for the current study, and so are not publicly available. Data are however available from the authors upon reasonable request and with permission of PI of Pittsburgh Girls’ Study.

**Competing interests:** The authors declare that they have no competing interests.

**Funding:** This study was supported by Fahs-Beck Fund.

**Authors’ contributions:** First author initiated original research ideas, performed all data analyses, interpreted results, and wrote the manuscript draft. Second author assisted with literature review, generated several tables, and worked on formatting. Senior author (PI of the original sub dataset) provided access to data and took a leadership in supervising this project. All authors read, edited, and approved the final manuscript.

**Acknowledgements:**  Not applicable.

**References**

1. Association AP. Diagnostic and statistical manual of mental disorders (DSM-5®). American Psychiatric Pub; 2013.

2. Lenzenweger MF. Current Status of the Scientific Study of the Personality Disorders: an Overview of Epidemiological, Longitudinal, Experimental Psychopathology, and Neurobehavioral Perspectives. J Am Psychoanal Assoc. SAGE Publications Inc; 2010;58:741–78.

3. Coid J, Yang M, Tyrer P, Roberts A, Ullrich S. Prevalence and correlates of personality disorder in Great Britain. Br J Psychiatry. Cambridge University Press; 2006;188:423–31.

4. Lenzenweger MF, Lane MC, Loranger AW, Kessler RC. DSM-IV personality disorders in the National Comorbidity Survey Replication. Biol Psychiatry. Elsevier; 2007;62:553–64.

5. Torgersen S, Kringlen E, Cramer V. The prevalence of personality disorders in a community sample. Arch Gen Psychiatry. American Medical Association; 2001;58:590–6.

6. Gunderson JG. Borderline personality disorder: ontogeny of a diagnosis. Am. J. Psychiatry. 2009. p. 530–9.

7. Juurlink TT, Vukadin M, Stringer B, Westerman MJ, Lamers F, Anema JR, et al. Barriers and facilitators to employment in borderline personality disorder: A qualitative study among patients, mental health practitioners and insurance physicians. PloS One. Public Library of Science San Francisco, CA USA; 2019;14:e0220233.

8. Lieb K, Zanarini MC, Schmahl C, Linehan MM, Bohus M. Borderline personality disorder. The Lancet. 2004. p. 453–61.

9. Whisman MA, Schonbrun YC. Social consequences of borderline personality disorder symptoms in a population-based survey: marital distress, marital violence, and marital disruption. J Disord. 2009. p. 410–5.

10. Herman JL, Perry JC, van der Kolk BA. Childhood trauma in borderline personality disorder. Am J Psychiatry. 1989. p. 490–5.

11. Machizawa-Summers S. Childhood trauma and parental bonding among Japanese female patients with borderline personality disorder. Int J Psychol. Chicago School of Professional Psychology, Chicago, IL, US smachizawa@thechicagoschool.edu; Machizawa-Summers, Sayaka,325 N. Wells Street,Chicago,US,60610,Chicago School of Professional Psychology,smachizawa@thechicagoschool.edu: Taylor & Francis Wiley-Blackwell Publishing Ltd.; 2007;42:265–73.

12. Venta A, Kenkel-Mikelonis R, Sharp C. A preliminary study of the relation between trauma symptoms and emerging BPD in adolescent inpatients. Bull Menn. Clin. 2012. p. 130–46.

13. Weaver TL, Clum GA. Early family environments and traumatic experiences associated with borderline personality disorder. J. Consult. Clin. Psychol. 1993. p. 1068.

14. Westphal M, Olfson M, Bravova M, Gameroff MJ, Gross R, Wickramaratne P, et al. Borderline personality disorder, exposure to interpersonal trauma, and psychiatric comorbidity in urban primary care patients. Psychiatry. 2013. p. 365–80.

15. Gratz KL, Tull MT, Baruch DE, Bornovalova MA, Lejuez CW. Factors associated with co-occurring borderline personality disorder among inner-city substance users: the roles of childhood maltreatment, negative affect intensity/reactivity, and emotion dysregulation. Compr Psychiatry. 2008. p. 603–15.

16. Tyrka AR, Wyche MC, Kelly MM, Price LH, Carpenter LL. Childhood maltreatment and adult personality disorder symptoms: influence of maltreatment type. Psychiatry Res. 2009. p. 281–7.

17. Yan Yuan, Hyunji Lee, Christina Newhill, Shaun Eack. A systematic review of the association between early childhood trauma and borderline personality disorder. J Personal Disord. In press;

18. Linehan M. Cognitive-behavioral treatment of borderline personality disorder. Guilford press; 1993.

19. Lynch TR, Chapman AL, Rosenthal MZ, Kuo JR, Linehan MM. Mechanisms of change in dialectical behavior therapy: theoretical and empirical observations. J Clin Psychol. 2006. p. 459–80.

20. Wagner AW, Rizvi SL, Harned MS. Applications of dialectical behavior therapy to the treatment of complex trauma-related problems: when one case formulation does not fit all. J Trauma Stress. 2007. p. 391–400.

21. Gross JJ. Handbook of Emotion Regulation, Second Edition [Internet]. New York, UNITED STATES: Guilford Publications; 2013 [cited 2020 Jul 8]. Available from: http://ebookcentral.proquest.com/lib/pitt-ebooks/detail.action?docID=1578364

22. Gross JJ, Jazaieri H. Emotion, emotion regulation, and psychopathology: An affective science perspective. Clin Psychol Sci. Sage Publications Sage CA: Los Angeles, CA; 2014;2:387–401.

23. Linehan M. Skills training manual for treating borderline personality disorder. New York: Guilford Press; 1993.

24. Reeves M, James LM, Pizzarello SM, Taylor JE. Support for Linehan’s biosocial theory from a nonclinical sample. J Personal Disord. Guilford Press; 2010;24:312–26.

25. Rosenthal MZ, Cheavens JS, Lejuez CW, Lynch TR. Thought suppression mediates the relationship between negative affect and borderline personality disorder symptoms. Behav Res Ther. Elsevier; 2005;43:1173–85.

26. Salsman NL, Linehan MM. An investigation of the relationships among negative affect, difficulties in emotion regulation, and features of borderline personality disorder. J Psychopathol Behav Assess. Springer; 2012;34:260–7.

27. Carpenter RW, Trull TJ. Components of emotion dysregulation in borderline personality disorder: A review. Curr Psychiatry Rep. Springer; 2013;15:335.

28. Cheavens JS, Rosenthal MZ, Daughters SB, Nowak J, Kosson D, Lynch TR, et al. An analogue investigation of the relationships among perceived parental criticism, negative affect, and borderline personality disorder features: The role of thought suppression. Behav Res Ther. Elsevier; 2005;43:257–68.

29. Badour CL, Resnick HS, Kilpatrick DG. Associations between specific negative emotions and DSM-5 PTSD among a national sample of interpersonal trauma survivors. J. Interpers. Violence. 2017. p. 1620–41.

30. Peters JR, Geiger PJ. Borderline Personality Disorder and Self-Conscious Affect: Too Much Shame But Not Enough Guilt? Personal Disord. 2016;7:303–8.

31. Rusch N, Schulz D, Valerius G, Steil R, Bohus M, Schmahl C. Disgust and implicit self-concept in women with borderline personality disorder and posttraumatic stress disorder. Eur Arch Psychiatry Clin Neurosci. 2011. p. 369–76.

32. Amstadter AB, Vernon LL. Emotional reactions during and after trauma: A comparison of trauma types. J Aggress Maltreatment Trauma. Taylor & Francis; 2008;16:391–408.

33. Glück T, Knefel M, Lueger-Schuster B. A network analysis of anger, shame, proposed ICD-11 post-traumatic stress disorder, and different types of childhood trauma in foster care settings in a sample of adult survivors. Eur J Psychotraumatology. 2017;8:1372543.

34. Scott LN, Wright AG, Beeney JE, Lazarus SA, Pilkonis PA, Stepp SD. Borderline personality disorder symptoms and aggression: A within-person process model. J. Abnorm. Psychol. 2017. p. 429.

35. Pfohl B, Blum N, Zimmerman M. Structured interview for DSM-IV personality: Sidp-IV. American Psychiatric Pub; 1997.

36. Morey LC. Personality assessment inventory. Psychological Assessment Resources Odessa, FL; 1991.

37. Bernstein DP, Stein JA, Newcomb MD, Walker E, Pogge D, Ahluvalia T, et al. Development and validation of a brief screening version of the Childhood Trauma Questionnaire. Child Abuse Negl. Elsevier; 2003;27:169–90.

38. Gratz KL, Roemer L. Multidimensional assessment of emotion regulation and dysregulation: Development, factor structure, and initial validation of the difficulties in emotion regulation scale. J. Psychopathol. Behav. Assess. 2004. p. 41–54.

39. Cohen TR, Wolf ST, Panter AT, Insko CA. Introducing the GASP scale: a new measure of guilt and shame proneness. J. Pers. Soc. Psychol. 2011. p. 947.

40. Spielberger CD. State-trait anger expression inventory-2. Psychological Assessment Resouces; 1999.

41. Mueller RO, Hancock GR. Structural equation modeling. Rev. Guide Quant. Methods Soc. Sci. Routledge; 2018. p. 445–56.

42. Rosseel Y. lavaan: An R Package for Structural Equation Modeling. J Stat Softw. 2012;48:1–36.

43. Carvalho Fernando S, Beblo T, Schlosser N, Terfehr K, Otte C, Lowe B, et al. The impact of self-reported childhood trauma on emotion regulation in borderline personality disorder and major depression. J Trauma Dissociation. 2014. p. 384–401.

44. Kuo JR, Khoury JE, Metcalfe R, Fitzpatrick S, Goodwill A. An examination of the relationship between childhood emotional abuse and borderline personality disorder features: the role of difficulties with emotion regulation. Child Abuse Negl. 2015. p. 147–55.

45. Laporte L, Paris J, Guttman H, Russell J. Psychopathology, childhood trauma, and personality traits in patients with borderline personality disorder and their sisters. J Disord. 2011. p. 448–62.

46. Wota AP, Byrne C, Murray I, Ofuafor T, Nisar Z, Neuner F, et al. An examination of childhood trauma in individuals attending an adult mental health service. Ir. J. Psychol. Med. 2014. p. 259–70.

47. Zhang TH, Chow A, Wang LL, Yu JH, Dai YF, Lu X, et al. Childhood maltreatment profile in a clinical population in China: a further analysis with existing data of an epidemiologic survey. Compr Psychiatry. 2013. p. 856–64.

48. Fossati A, Gratz KL, Somma A, Maffei C, Borroni S. The Mediating Role of Emotion Dysregulation in the Relations Between Childhood Trauma History and Adult Attachment and Borderline Personality Disorder Features: A Study of Italian Nonclinical Participants. J Disord. 2016. p. 653–76.

49. Laporte L, Paris J, Guttman H, Russell J, Correa JA. Using a sibling design to compare childhood adversities in female patients with BPD and their sisters. Child Maltreat. 2012. p. 318–29.

50. Hengartner MP, Ajdacic-Gross V, Rodgers S, Müller M, Rössler W. Childhood adversity in association with personality disorder dimensions: New findings in an old debate. Eur. Psychiatry. 2013. p. 476–82.

51. Hong PY, Lishner DA. General invalidation and trauma-specific invalidation as predictors of personality and subclinical psychopathology. Personal. Individ. Differ. 2016. p. 211–6.

52. Pagura J, Stein MB, Bolton JM, Cox BJ, Grant B, Sareen J. Comorbidity of borderline personality disorder and posttraumatic stress disorder in the U.S. population. J Psychiatr Res. 2010. p. 1190–8.

53. Afifi TO, Mather A, Boman J, Fleisher W, Enns MW, Macmillan H, et al. Childhood adversity and personality disorders: results from a nationally representative population-based study. J Psychiatr Res. 2011. p. 814–22.

54. Waxman R, Fenton MC, Skodol AE, Grant BF, Hasin D. Childhood maltreatment and personality disorders in the USA: Specificity of effects and the impact of gender. Personal. Ment. Health. 2014. p. 30–41.

55. Griffin DW, Bartholomew K. Models of the self and other: Fundamental dimensions underlying measures of adult attachment. J. Pers. Soc. Psychol. 1994. p. 430.

56. Baryshnikov I, Joffe G, Koivisto M, Melartin T, Aaltonen K, Suominen K, et al. Relationships between self-reported childhood traumatic experiences, attachment style, neuroticism and features of borderline personality disorders in patients with mood disorders. J Affect Disord. 2017. p. 82–9.

57. Battle CL, Shea MT, Johnson DM, Zlotnick C, Zanarini MC, Sanislow CA, et al. Childhood maltreatment associated with adult personality disorders: findings from the Collaborative Longitudinal Personality Disorders Study. J. Personal. Disord. 2004. p. 193.

58. Hareli S, Parkinson B. What’s social about social emotions? J Theory Soc Behav. Wiley Online Library; 2008;38:131–56.

59. Gaher RM, Hofman NL, Simons JS, Hunsaker R. Emotion regulation deficits as mediators between trauma exposure and borderline symptoms. Cogn Ther Res. Springer; 2013;37:466–75.

60. Khosravi M. Child maltreatment-related dissociation and its core mediation schemas in patients with borderline personality disorder. BMC Psychiatry. Springer; 2020;20:1–9.

61. Zanarini, Williams AA, Lewis RE, Reich RB, Vera SC, Marino MF, et al. Reported pathological childhood experiences associated with the development of borderline personality disorder. Am J Psychiatry. 1997. p. 1101–6.

62. Division (DCD) DC. What is child abuse or neglect? What is the definition of child abuse and neglect? [Internet]. HHS.gov. 13AD [cited 2022 Nov 3]. Available from: https://www.hhs.gov/answers/programs-for-families-and-children/what-is-child-abuse/index.html

63. Carvalho Fernando S, Beblo T, Schlosser N, Terfehr K, Otte C, Lowe B, et al. Associations of childhood trauma with hypothalamic-pituitary-adrenal function in borderline personality disorder and major depression. Psychoneuroendocrinology. 2012. p. 1659–68.

64. Aase H, Sagvolden T. Moment-to-moment dynamics of ADHD behaviour. Behav Brain Funct. 2005. p. 12.

65. Harned MS, Korslund KE, Foa EB, Linehan MM. Treating PTSD in suicidal and self-injuring women with borderline personality disorder: development and preliminary evaluation of a Dialectical Behavior Therapy Prolonged Exposure Protocol. Behav Res Ther. 2012. p. 381–6.

66. Harned MS, Korslund KE, Linehan MM. A pilot randomized controlled trial of Dialectical Behavior Therapy with and without the Dialectical Behavior Therapy Prolonged Exposure protocol for suicidal and self-injuring women with borderline personality disorder and PTSD. Behav Res Ther. 2014. p. 7–17.

67. Pabst A, Schauer M, Bernhardt K, Ruf-Leuschner M, Goder R, Elbert T, et al. Evaluation of narrative exposure therapy (NET) for borderline personality disorder with comorbid posttraumatic stress disorder. Clin. Neuropsychiatry. 2014. p. 108–17.

68. Steuwe C, Rullkötter N, Ertl V, Berg M, Neuner F, Beblo T, et al. Effectiveness and feasibility of Narrative Exposure Therapy (NET) in patients with borderline personality disorder and posttraumatic stress disorder–a pilot study. BMC Psychiatry. 2016. p. 254.

69. Linehan MM, Comtois KA, Ward-Ciesielski EF. Assessing and managing risk with suicidal individuals. Cogn Behav Pract. Elsevier; 2012;19:218–32.

| Table 1 | |
| --- | --- |
| Demographic Characteristics of Study Participants (N=144) | | |
| Variables | *n* (%) |
| Age: Mean at Wave 1 (Range) | 21.51 (18.83-24.91) |
| Race/Ethnicity |  |
| African American | 101 (70.1) |
| White | 40 (27.8) |
| Multiracial | 3 (2.1) |
| Sexual orientation |  |
| Heterosexual orientation | 107 (74.3) |
| Bisexual orientation | 23 (16) |
| Gay/lesbian/homosexual orientation | 12 (8.3) |
| Not sure | 2 (1.4) |
| Marital status |  |
| Never married | 134 (93.1) |
| Married/living with someone | 10 (6.9) |
| Education level |  |
| Grade 7 to 12 did not graduate high school | 14 (9.7) |
| High school/HS equivalent | 60 (41.7) |
| College (graduated 2-year or 4-year college/part  college) | 67 (46.5) |
| Graduate/professional school (completed/part  graduate or professional school) | 3 (2.1) |
| Employment status |  |
| Homemaker | 2 (1.4) |
| Did not work due to disability | 2 (1.4) |
| Did not work | 49 (34) |
| Worked full time | 36 (25) |
| Worked part time | 55 (38.2) |

| Table 2.1. Measures | | | | | | | |
| --- | --- | --- | --- | --- | --- | --- | --- |
|  | Item # | Cronbach's 𝛼 | *M* | *SD* | Skewness | Kurtosis | Range |
| CTQ | Total | 𝛼=.92 (6 subscales with MN) | 54.2 | 14.5 | 1.55 | 6.13 | 34-117 |
|  | Total | 𝛼=.91 (5 subscales without <M) | 46.3 | 16.2 | 1.27 | 5.09 | 25-111 |
| PN | 1 | 𝛼=.71 |  |  |  |  |  |
| 2 |  |  |  |  |  |
| 4 |  |  |  |  |  |
| 6 |  |  |  |  |  |
| 26 |  |  |  |  |  |
| EA | 3 | 𝛼=.82 |  |  |  |  |  |
| 8 |  |  |  |  |  |
| 14 |  |  |  |  |  |
| 18 |  |  |  |  |  |
| 25 |  |  |  |  |  |
| EN | 5 | 𝛼=.84 |  |  |  |  |  |
| 7 |  |  |  |  |  |
| 13 |  |  |  |  |  |
| 19 |  |  |  |  |  |
| 28 |  |  |  |  |  |
| PA | 9 | 𝛼=.76 |  |  |  |  |  |
| 11 |  |  |  |  |  |
| 12 |  |  |  |  |  |
| 15 |  |  |  |  |  |
| 17 |  |  |  |  |  |
| MN | 10 | 𝛼=.79 |  |  |  |  |  |
| 16 |  |  |  |  |  |
| 22 |  |  |  |  |  |
| SA | 20 | 𝛼=.93 |  |  |  |  |  |
| 21 |  |  |  |  |  |
| 23 |  |  |  |  |  |
| 24 |  |  |  |  |  |
| 27 |  |  |  |  |  |

| Table 2.2. Measures (continued) | | | | | | | |
| --- | --- | --- | --- | --- | --- | --- | --- |
|  | Item # | Cronbach's 𝛼 | *M* | *SD* | Skewness | Kurtosis | Range |
| Anger (STAXI) | Total | 𝛼=.91 (30 items) | 69.8 | 13.3 | 0.48 | 2.62 | 43-109 |
| T-Anger | STAXI12 | 𝛼=.88 |  |  |  |  |  |
| STAXI13 |  |  |  |  |  |
| STAXI14 |  |  |  |  |  |
| STAXI15 |  |  |  |  |  |
| STAXI16 |  |  |  |  |  |
| STAXI17 |  |  |  |  |  |
| STAXI18 |  |  |  |  |  |
| STAXI19 |  |  |  |  |  |
| STAXI20 |  |  |  |  |  |
| Ang-Con | STAXI24 | 𝛼=.81 |  |  |  |  |  |
| STAXI28 |  |  |  |  |  |
| STAXI31 |  |  |  |  |  |
| STAXI35 |  |  |  |  |  |
| STAXI38 |  |  |  |  |  |
| STAXI40 |  |  |  |  |  |
| Ang-Out | STAXI27 | 𝛼=.83 |  |  |  |  |  |
| STAXI29 |  |  |  |  |  |
| STAXI32 |  |  |  |  |  |
| STAXI34 |  |  |  |  |  |
| STAXI39 |  |  |  |  |  |
| STAXI42 |  |  |  |  |  |
| STAXI43 |  |  |  |  |  |
| Ang-In | STAXI25 | 𝛼=.71 |  |  |  |  |  |
| STAXI26 |  |  |  |  |  |
| STAXI30 |  |  |  |  |  |
| STAXI33 |  |  |  |  |  |
| STAXI36 |  |  |  |  |  |
| STAXI37 |  |  |  |  |  |
| STAXI41 |  |  |  |  |  |

| Table 2.3. Measures (continued) | | | | | | | |
| --- | --- | --- | --- | --- | --- | --- | --- |
|  | Item # | Cronbach's 𝛼 | *M* | *SD* | Skewness | Kurtosis | Range |
| PAIBOR | Total | 𝛼=.87 | 59.5 | 11.4 | -0.07 | 2.49 | 32-85 |
| Affect Instability | paibor1 | 𝛼=.72 |  |  |  |  |  |
| paibor4 |  |  |  |  |  |
| paibor7r |  |  |  |  |  |
| paibor10 |  |  |  |  |  |
| paibor14r |  |  |  |  |  |
| paibor18 |  |  |  |  |  |
| Identity Problems | paibor2 | 𝛼=.68 |  |  |  |  |  |
| paibor5 |  |  |  |  |  |
| paibor8 |  |  |  |  |  |
| paibor11 |  |  |  |  |  |
| paibor15 |  |  |  |  |  |
| paibor19r |  |  |  |  |  |
| Negative Relationships | paibor3 | 𝛼=.64 |  |  |  |  |  |
| paibor6 |  |  |  |  |  |
| paibor9 |  |  |  |  |  |
| paibor12r |  |  |  |  |  |
| paibor16 |  |  |  |  |  |
| paibor20r |  |  |  |  |  |
| Self-harm | paibor13 | 𝛼=.73 |  |  |  |  |  |
| paibor17 |  |  |  |  |  |
| paibor21 |  |  |  |  |  |
| paibor22 |  |  |  |  |  |
| paibor23 |  |  |  |  |  |
| paibor24r |  |  |  |  |  |

| Table 2.4. Measures (continued) | | | | | | | |
| --- | --- | --- | --- | --- | --- | --- | --- |
| GASP | Total | 𝛼=.80 | 71.1 | 14.9 | -0.48 | 2.76 | 27-104 |
| Guilt‐Negative‐Behavior‐Evaluation | 1 | 𝛼=.69 |  |  |  |  |  |
| 9 |  |  |  |  |  |
| 14 |  |  |  |  |  |
| 16 |  |  |  |  |  |
| Guilt‐Repair | 2 | 𝛼=.54 |  |  |  |  |  |
| 5 |  |  |  |  |  |
| 11 |  |  |  |  |  |
| 15 |  |  |  |  |  |
| Shame‐Negative‐Self‐Evaluation | 3 | 𝛼=.72 |  |  |  |  |  |
| 6 |  |  |  |  |  |
| 10 |  |  |  |  |  |
| 13 |  |  |  |  |  |
| Shame‐Withdraw | 4 | 𝛼=.55 |  |  |  |  |  |
| 7 |  |  |  |  |  |
| 8 |  |  |  |  |  |
| 12 |  |  |  |  |  |

| Table 2.5. Measures (continued) | | | | | | | |
| --- | --- | --- | --- | --- | --- | --- | --- |
|  | Item # | Cronbach's 𝛼 | *M* | *SD* | Skewness | Kurtosis | Range |
| DERS | Total | 𝛼=.91 | 91.3 | 20.7 | 0.34 | 2.8 | 50-149 |
| Nonacceptance of emotional responses | 11 | 𝛼=.85 |  |  |  |  |  |
| 12 |  |  |  |  |  |
| 21 |  |  |  |  |  |
| 23 |  |  |  |  |  |
| 25 |  |  |  |  |  |
| 29 |  |  |  |  |  |
| Difficulty engaging in goal-directed behavior | 13 | 𝛼=.72 |  |  |  |  |  |
| 18 |  |  |  |  |  |
| 20R |  |  |  |  |  |
| 26 |  |  |  |  |  |
| 33 |  |  |  |  |  |
| Impulse control difficulties | 3 | 𝛼=.81 |  |  |  |  |  |
| 14 |  |  |  |  |  |
| 19 |  |  |  |  |  |
| 24r |  |  |  |  |  |
| 27 |  |  |  |  |  |
| 32 |  |  |  |  |  |
| Lack of emotional awareness | 2r | 𝛼=.85 |  |  |  |  |  |
| 6r |  |  |  |  |  |
| 8r |  |  |  |  |  |
| 10r |  |  |  |  |  |
| 17r |  |  |  |  |  |
| 34r |  |  |  |  |  |
| Limited access to emotion regulation strategies | 15 | 𝛼=85 |  |  |  |  |  |
| 16 |  |  |  |  |  |
| 22r |  |  |  |  |  |
| 28 |  |  |  |  |  |
| 30 |  |  |  |  |  |
| 31 |  |  |  |  |  |
| 35 |  |  |  |  |  |
| 36 |  |  |  |  |  |
| Lack of emotional clarity | 1r | 𝛼=.76 |  |  |  |  |  |
| 4 |  |  |  |  |  |
| 5 |  |  |  |  |  |
| 7r |  |  |  |  |  |
| 9 |  |  |  |  |  |

| Table 3 Regression Models Predicting BPD Features (N=144) | | | | | | | | | | | | | | | | | |  |  |  |
| --- | --- | --- | --- | --- | --- | --- | --- | --- | --- | --- | --- | --- | --- | --- | --- | --- | --- | --- | --- | --- |
| Variables | Model 1 | | | |  | Model2 | | |  | Model 3 | | |  | Model 4 | | |  |  |  |  |
|  | b | se | t | p |  | b | se | t | p |  | b | se | t | p |  | b | se | t | p |  |
| (Intercept) | 0.96 | 1.11 | 0.86 | 0.39 |  | -3.88 | 1.78 | -2.18 | 0.03 | * | -4.46 | 2.84 | -1.57 | 0.12 |  | -4.30 | 3.49 | -1.23 | 0.22 |  |
| CTQ_EA | 0.19 | 0.10 | 2.01 | 0.05 | * | 0.15 | 0.09 | 1.76 | 0.08 | . | 0.15 | 0.09 | 1.70 | 0.09 | . | 0.17 | 0.09 | 1.98 | 0.05 | * |
| CTQ_PA | 0.19 | 0.13 | 1.43 | 0.16 |  | 0.16 | 0.12 | 1.35 | 0.18 |  | 0.10 | 0.12 | 0.86 | 0.39 |  | 0.10 | 0.12 | 0.88 | 0.38 |  |
| CTQ_SA | 0.07 | 0.08 | 0.88 | 0.38 |  | 0.10 | 0.07 | 1.41 | 0.16 |  | 0.10 | 0.07 | 1.31 | 0.19 |  | 0.08 | 0.07 | 1.17 | 0.24 |  |
| CTQ_EN | 0.05 | 0.10 | 0.54 | 0.59 |  | -0.02 | 0.09 | -0.25 | 0.80 |  | 0.01 | 0.09 | 0.07 | 0.94 |  | -0.04 | 0.09 | -0.41 | 0.68 |  |
| CTQ_PN | 0.17 | 0.13 | 1.30 | 0.19 |  | 0.13 | 0.12 | 1.05 | 0.29 |  | 0.11 | 0.12 | 0.89 | 0.38 |  | 0.14 | 0.12 | 1.16 | 0.25 |  |
| Non-acceptance | |  |  |  |  | 0.04 | 0.08 | 0.52 | 0.60 |  | 0.02 | 0.08 | 0.28 | 0.78 |  | 0.07 | 0.08 | 0.82 | 0.41 |  |
| Goals |  |  |  |  |  | -0.14 | 0.10 | -1.41 | 0.16 |  | -0.15 | 0.10 | -1.52 | 0.13 |  | -0.11 | 0.10 | -1.10 | 0.28 |  |
| Impulse |  |  |  |  |  | 0.28 | 0.08 | 3.60 | 0.00 | *** | 0.24 | 0.10 | 2.38 | 0.02 | * | 0.19 | 0.10 | 1.90 | 0.06 | . |
| Awareness |  |  |  |  |  | -0.03 | 0.08 | -0.40 | 0.69 |  | 0.00 | 0.08 | 0.00 | 1.00 |  | 0.05 | 0.08 | 0.69 | 0.49 |  |
| Strategies |  |  |  |  |  | 0.07 | 0.08 | 0.92 | 0.36 |  | 0.06 | 0.08 | 0.67 | 0.50 |  | 0.10 | 0.08 | 1.20 | 0.23 |  |
| Clarity |  |  |  |  |  | 0.21 | 0.11 | 1.85 | 0.07 | . | 0.20 | 0.12 | 1.68 | 0.10 | . | 0.14 | 0.12 | 1.19 | 0.24 |  |
| Trait Anger |  |  |  |  |  |  |  |  |  |  | 0.27 | 0.81 | 0.34 | 0.74 |  | 0.49 | 0.81 | 0.60 | 0.55 |  |
| Anger Control |  |  |  |  |  |  |  |  |  |  | -0.70 | 0.68 | -1.04 | 0.30 |  | -0.69 | 0.67 | -1.02 | 0.31 |  |
| Anger Expression Out |  |  |  |  |  |  |  |  |  |  | 0.91 | 0.76 | 1.19 | 0.24 |  | 0.63 | 0.79 | 0.80 | 0.42 |  |
| Anger Expression in |  |  |  |  |  |  |  |  |  |  | 0.80 | 0.74 | 1.08 | 0.28 |  | 0.71 | 0.72 | 0.99 | 0.32 |  |
| NBE |  |  |  |  |  |  |  |  |  |  |  |  |  |  |  | -0.08 | 0.34 | -0.23 | 0.82 |  |
| GR |  |  |  |  |  |  |  |  |  |  |  |  |  |  |  | 0.64 | 0.41 | 1.57 | 0.12 |  |
| NSE |  |  |  |  |  |  |  |  |  |  |  |  |  |  |  | -0.79 | 0.32 | -2.49 | 0.01 | * |
| SW |  |  |  |  |  |  |  |  |  |  |  |  |  |  |  | -0.24 | 0.31 | -0.79 | 0.43 |  |
| *R2adjusted* | 0.18 |  |  |  |  | 0.36 |  |  |  |  | 0.38 |  |  |  |  | 0.41 |  |  |  |  |
| *F* | 7.47 |  |  |  |  | 8.45 |  |  |  |  | 6.88 |  |  |  |  | 6.22 |  |  |  |  |
| *df* | 5,138 |  |  |  |  | 11,132 |  |  |  |  | 15,128 |  |  |  |  | 19,124 |  |  |  |  |
| *p (∆R2)* |  |  |  |  |  | <.001 | *** |  |  |  | 0.1 |  |  |  |  | 0.05 | * |  |  |  |
| Note. * p<.05, ** p<.01, *** p<.001. | | | | | | | | | | | | | | | | | | | | |

| Table 4 *Standardized Parameter Estimates for the SEM Model* | | | | | | | | | | | | | | | | | |
| --- | --- | --- | --- | --- | --- | --- | --- | --- | --- | --- | --- | --- | --- | --- | --- | --- | --- |
| **Measurement Model** | | | | | | | | | | | | | | | | | |
|  |  | | ***B*** | | ***SE*** | | | ***z*** | | | ***p*** | | | ***ß*** | | ***R2*** | |
| Trauma | 🡪Childhood emotional abuse | 1 | |  | |  | | |  | | | .78 | | | .61 | | |
| 🡪Childhood physical abuse | .73 | | .09 | | 8.13 | | | .00 | | | .77 | | | .59 | | |
| 🡪Childhood sexual abuse | .68 | | .12 | | 5.66 | | | .00 | | | .52 | | | .27 | | |
| 🡪Childhood emotional neglect | .74 | | .11 | | 6.64 | | | .00 | | | .61 | | | .37 | | |
| 🡪Childhood physical neglect | .46 | | .08 | | 5.79 | | | .00 | | | .54 | | | .29 | | |
|  |  |  | |  | |  | | |  | | |  | | |  | | |
| ED | 🡪Non-acceptance | 1 | |  | |  | | |  | | | .53 | | | .28 | | |
| 🡪Goal-directed behavior | .90 | | .15 | | 6.13 | | | .00 | | | .59 | | | .35 | | |
| 🡪Impulse control | 1.68 | | .26 | | 6.36 | | | .00 | | | .84 | | | .71 | | |
| 🡪Emotional regulation strategies | 1.68 | | .23 | | 7.43 | | | .00 | | | .71 | | | .50 | | |
| 🡪Emotional clarity | .62 | | .14 | | 4.35 | | | .00 | | | .45 | | | .20 | | |
| 🡪Anger control | -.10 | | .03 | | -3.99 | | | .00 | | | -.46 | | | .21 | | |
| 🡪Ange expression | .49 | | .08 | | 6.19 | | | .00 | | | .79 | | | .62 | | |
| 🡪Shame-withdraw | .15 | | .04 | | 3.65 | | | .00 | | | .36 | | | .13 | | |
|  |  |  | |  | |  | | |  | | |  | | |  | | |
| BPD | 🡪Affective instability | 1 | |  | |  | | |  | | | .87 | | | .75 | | |
| 🡪Identity problems | .81 | | .09 | | 8.55 | | | .00 | | | .69 | | | .47 | | |
| 🡪Negative emotions | .75 | | .09 | | 8.15 | | | .00 | | | .65 | | | .43 | | |
| 🡪Self-harm | .72 | | .10 | | 7.44 | | | .00 | | | .68 | | | .47 | | |
| **Structural Model** | | | | | | | | | | | | | | | | | |
|  |  | | ***B*** | | ***SE*** | | ***z*** | | | ***p*** | | | ***ß*** | | | | ***R2*** |
| BPD | 🡪Trauma (a2) | .29 | | .06 | | 5.05 | | | .00 | | | .36 | | | .82 | | |
| 🡪ED (a1) | .83 | | .14 | | 5.88 | | | .00 | | | .74 | | |  | | |
| ED | 🡪Trauma (a3) | .21 | | .08 | | 2.68 | | | .01 | | | .29 | | | .08 | | |
| Indirect  Effect a1*a3 | | .17 | | .06 | | 2.86 | | | .00 | | | .21 | | |  | | |
| Total  Effect a2+(a1*a3) | | .46 | | .08 | | 5.70 | | | .00 | | | .57 | | |  | | |


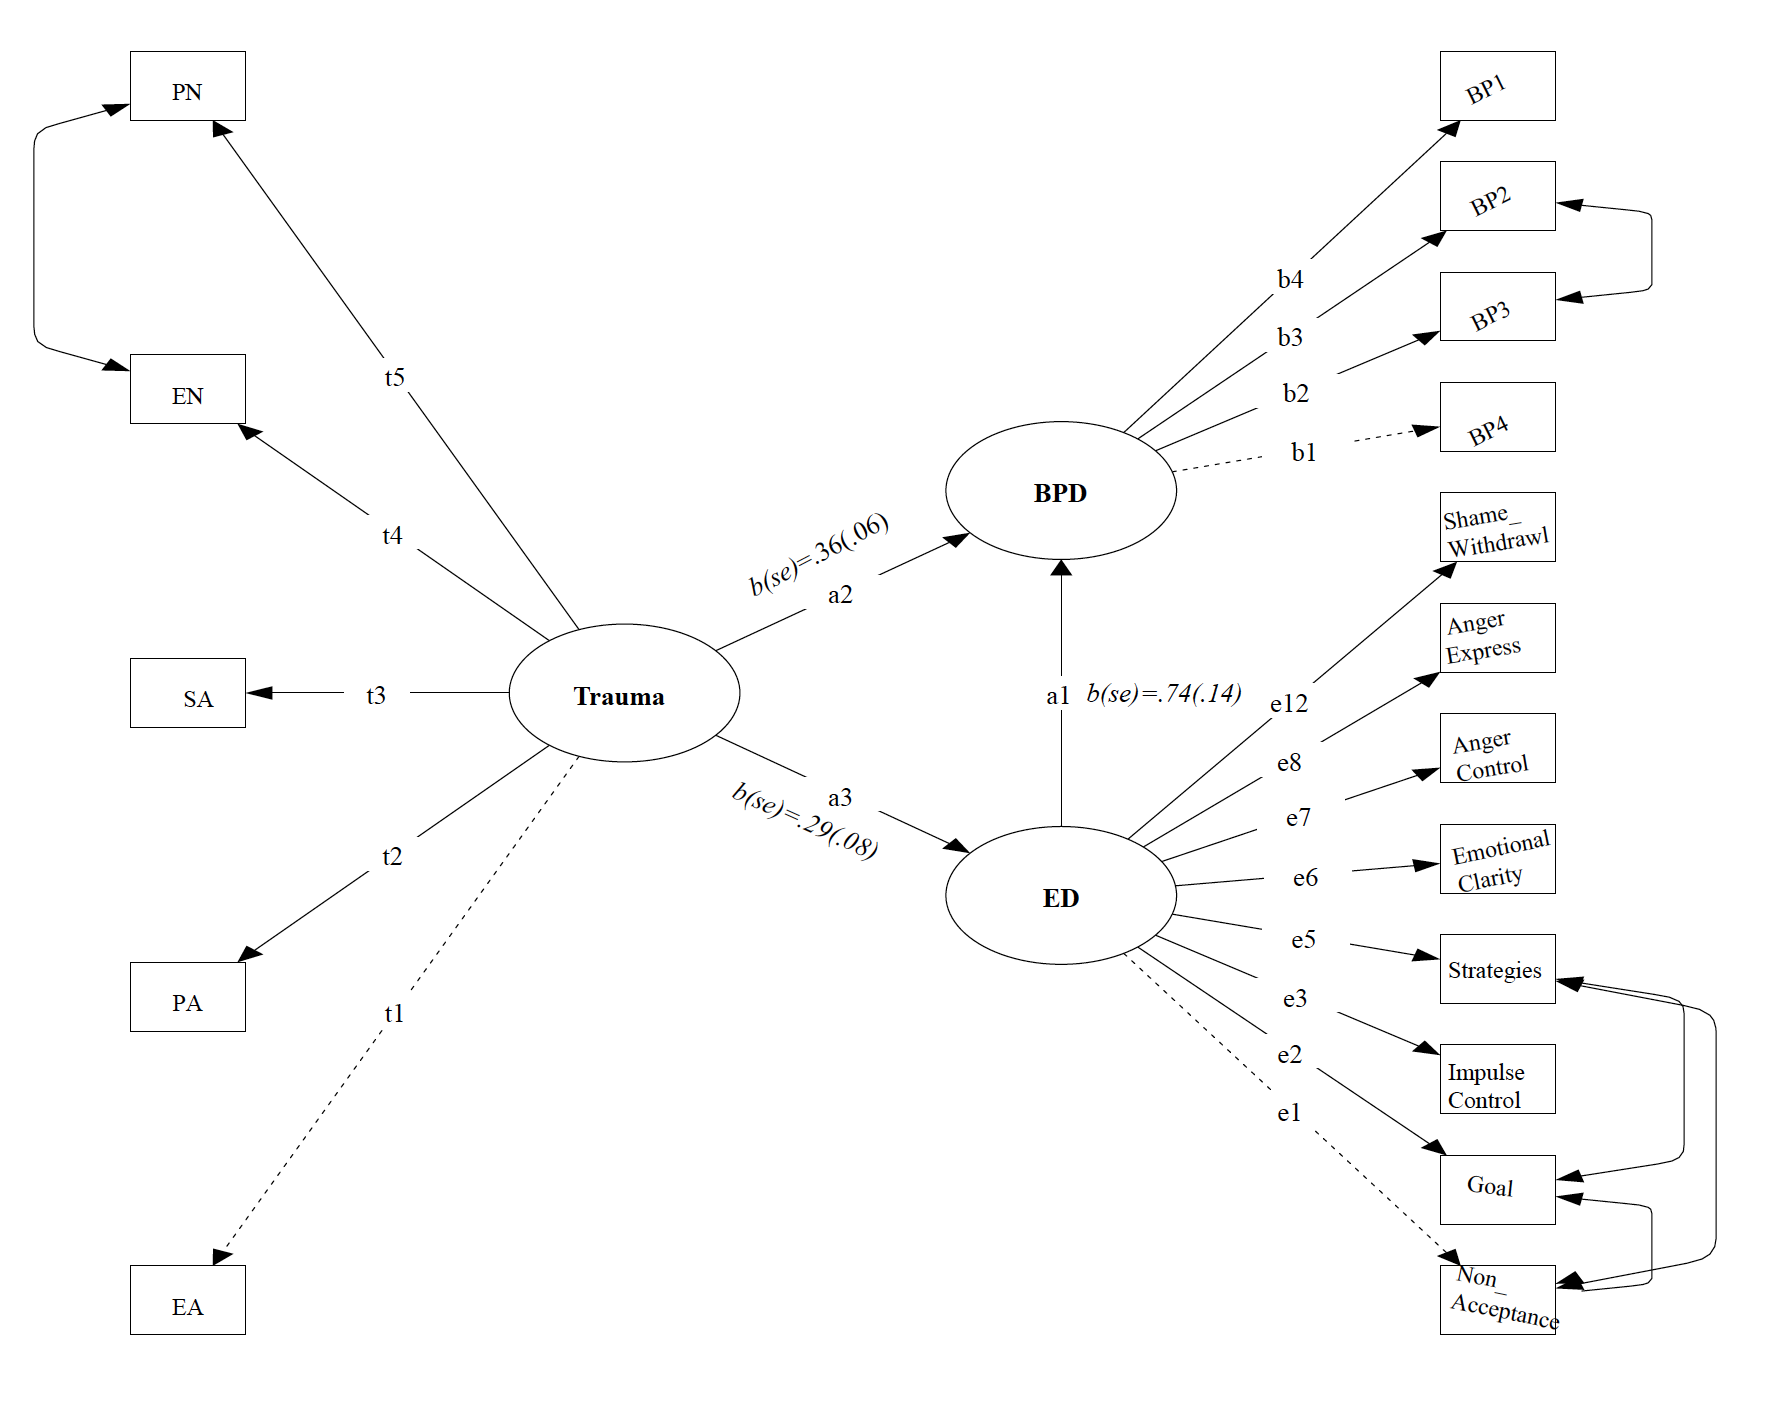


Figure 1 A Path Diagram of Trauma Predicting BPD Partially Mediated via Emotion Dysregulation Dimensions[[1]](#footnote-1)

1. PN=Physical Neglect, EN=Emotional Neglect, SA=Sexual Abuse, PA=Physical Abuse, EA=Emotional Abuse, BP 1=Affective instability, BP 2= Identity problems, BP 3= Negative Relations, BP 4=Self-harm. Measurement model parameters which were omitted here for a more clear and concise display. All parameters were significant except for three ED subconstructs. Parameters of the paths displayed via dotted lines were fixed. Double arrow lines stand for the covariances among subconstructs. [↑](#footnote-ref-1)
